# Supplementary material for: Enhancing Innovation and Underlying Neural Mechanisms Via Cognitive Training in Healthy Older Adults
Source: PubMed Central journal article supplement (PMC5640779; doi:10.3389/fnagi.2017.00314), 2017-10-09
Supplement: Image_1.pdf [file Image_1.pdf]

Figure S1. Flow diagram of the progress through the phases of a parallel randomized trial of 3 groups.

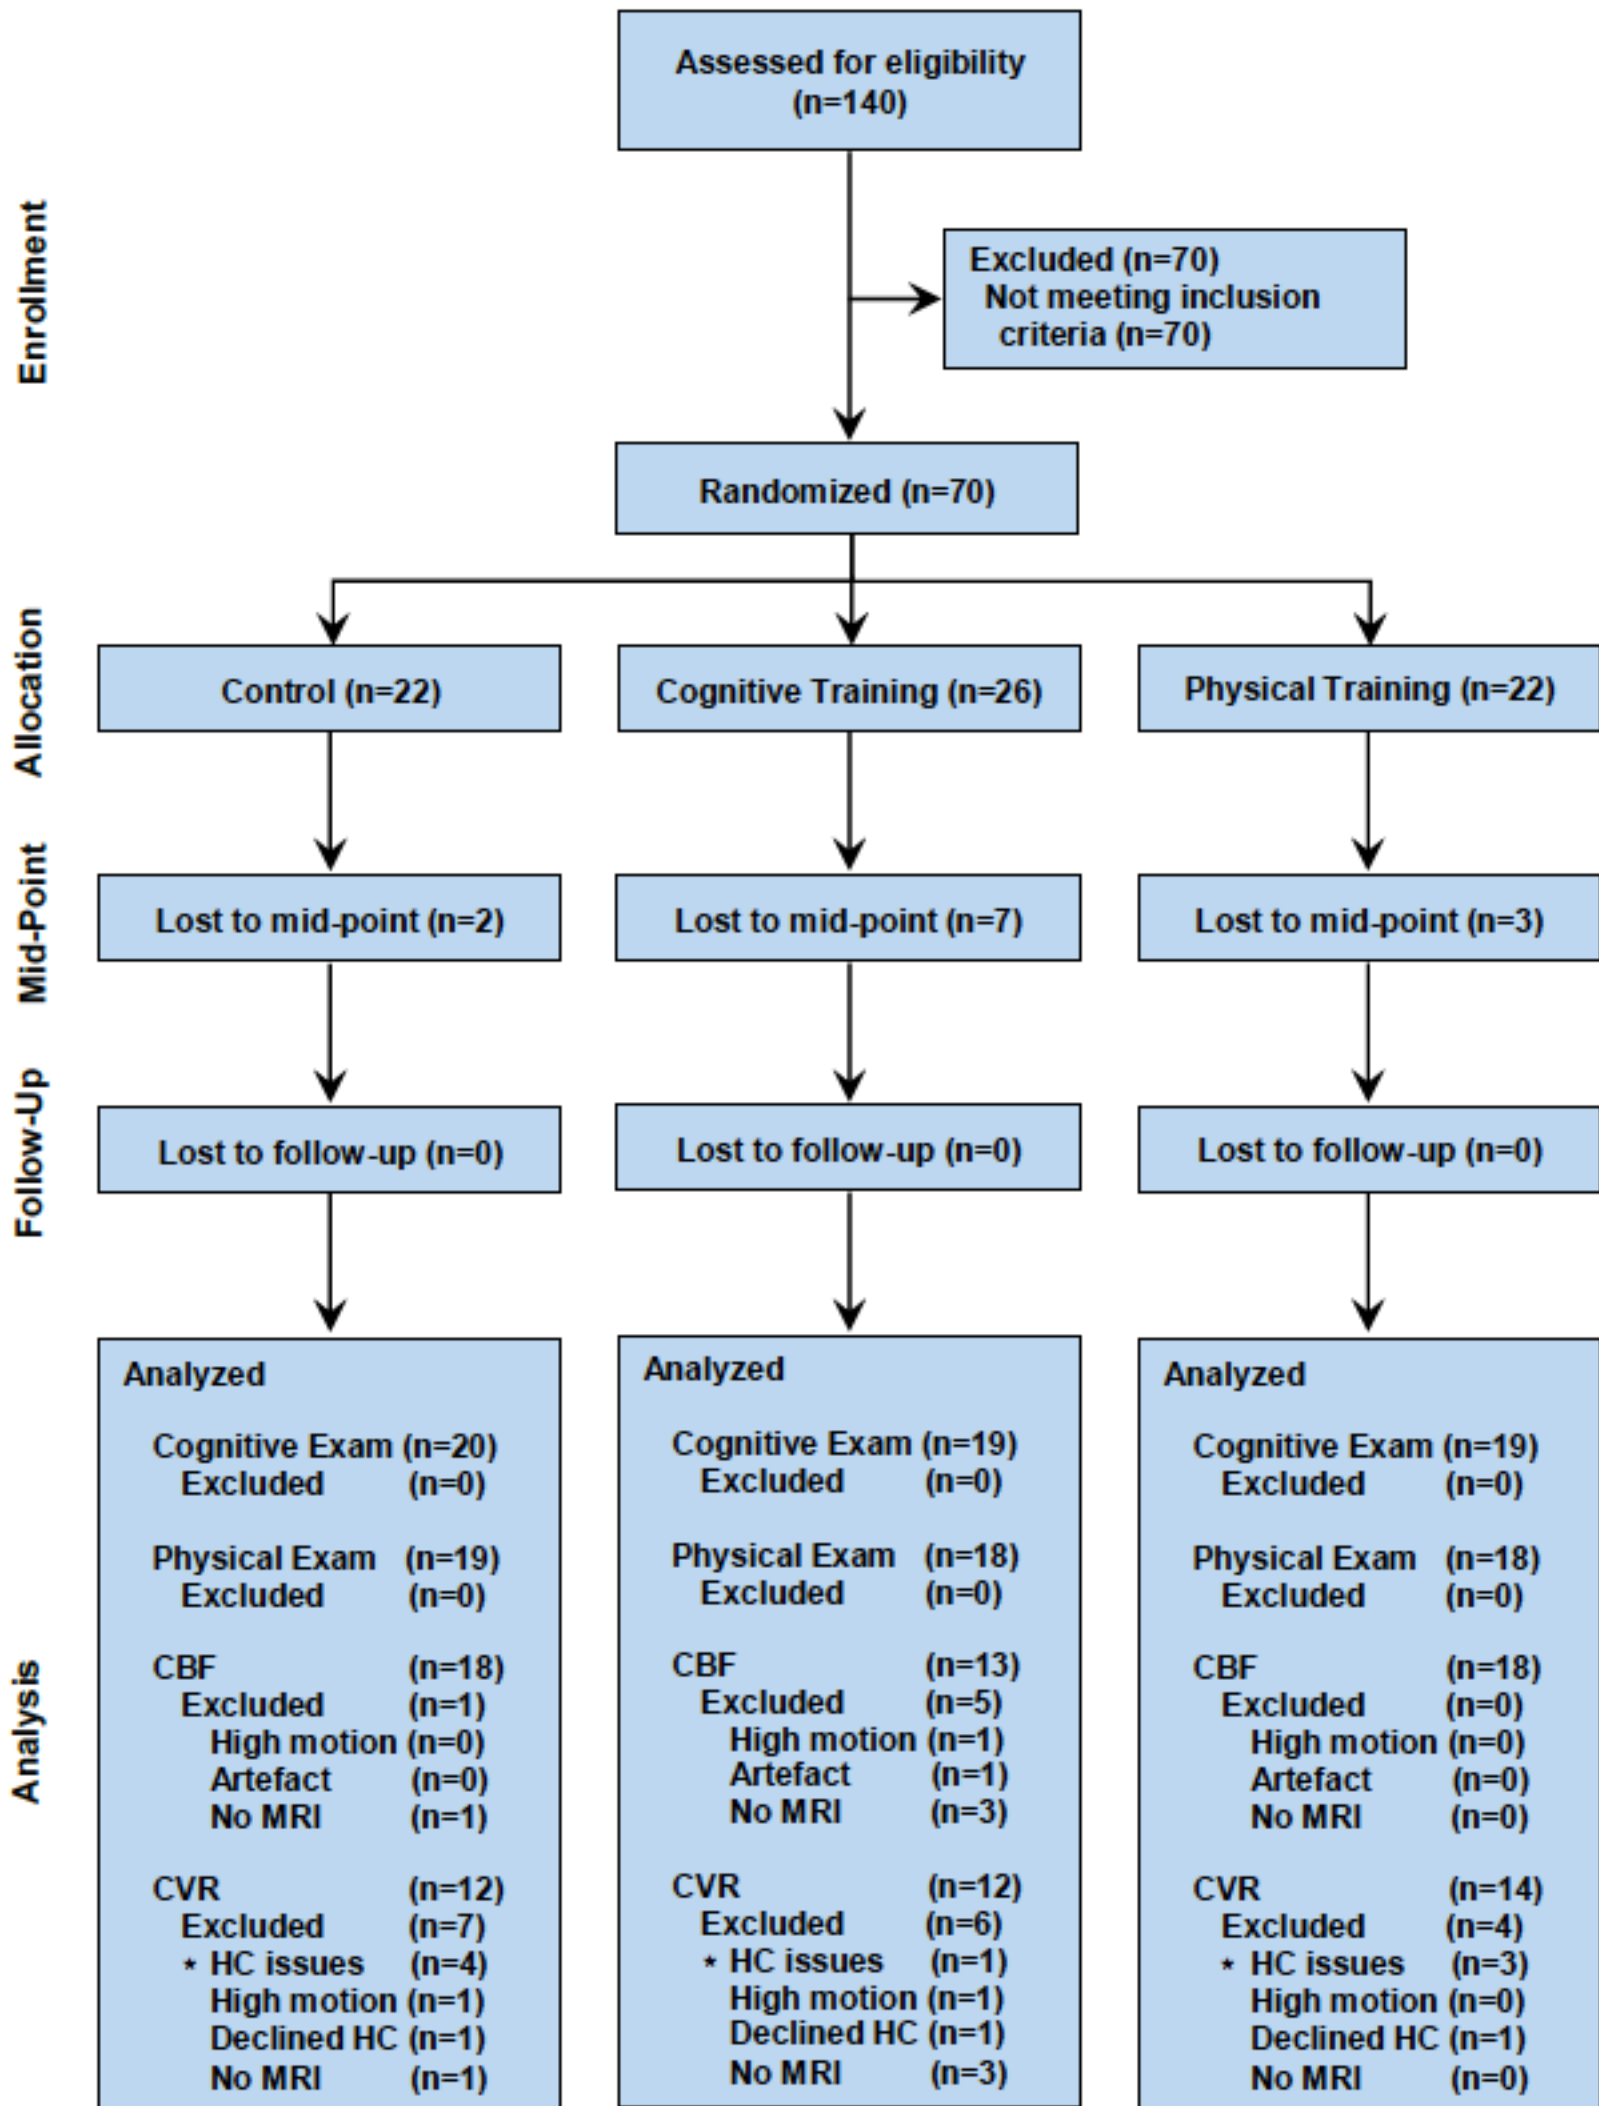

\* HC Issues – Hypercapnia (HC) machine malfunctioned (e.g. no capnography recording), participant's nose clip fell off, subject hyper- or hypo-ventilated during the experiment.
