# Supplementary material for: Enhancing Innovation and Underlying Neural Mechanisms Via Cognitive Training in Healthy Older Adults
Source: PubMed Central journal article supplement (PMC5640779; doi:10.3389/fnagi.2017.00314), 2017-10-09

**Figure S2. QQ plot of studentized residuals for outlier diagnostics of the CEN model.** One subject (lower left green circle) in the CT group was removed based on the studentized residual = -4.16, identified by outlier test (Bonferroni p-value =0.010).

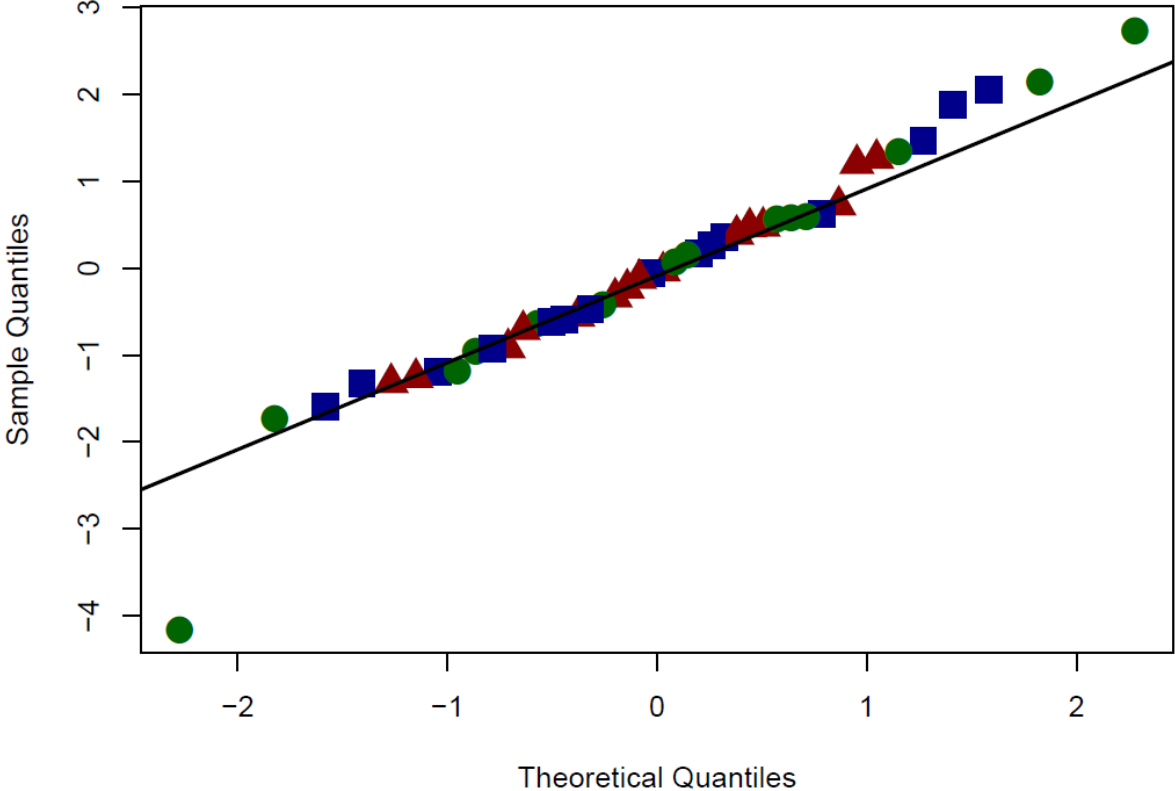

Supplement: Image_2.pdf [file Image_2.pdf]
